# Supplementary material for: Comparison of Four Commercial Kits for Isolation of Urinary Cell-Free DNA and Sample Storage Conditions
Source: Diagnostics (Basel). 2020 Apr 18;10(4):234. doi: 10.3390/diagnostics10040234 (PMC7236016; doi:10.3390/diagnostics10040234)
Supplement: Supplementary file 1 [file diagnostics-10-00234-s001.xlsx]

## Sheet: Table S1
Bioanalyzer ; 50bp~300bp
																QC	MM	NU	ZQ
Sample ID	Qiagen (urine 4ml)			Magmax (urine 4ml)			Norgen (urine 10ml)			Zymo (urine 24ml)				Ave.	50bp~300bp	1.01905	1.5569	0.548795	0.372719
	conc. (ng/ul)	Total (ng)	Yield (ng/urine1ml)	conc. (ng/ul)	Total (ng)	Yield (ng/urine1ml)	conc. (ng/ul)	Total (ng)	Yield (ng/urine1ml)	conc. (ng/ul)	Total (ng)	Yield (ng/urine1ml)			50bp~100bp	0.119313	0.285865	0.14937	0.0387713
01M	0.03474	1.737	0.43425	0.0896	1.792	0.448	0.06914	3.457	0.3457	0.03273	0.9819	0.0409125		STDEV	50bp~300bp	1.35407	2.52556	0.745514	0.492016
02M	0.01427	0.7135	0.178375	0.03528	0.7056	0.1764	0.09837	4.9185	0.49185	0.01887	0.5661	0.0235875			50bp~100bp	0.0996505	0.423978	0.0632786	0.0558294
03M	0.02812	1.406	0.3515	0.00234	0.0468	0.0117	0.0449	2.245	0.2245	0.06057	1.8171	0.0757125
04M	0.01753	0.8765	0.219125	0.04188	0.8376	0.2094	0.01569	0.7845	0.07845	0.01134	0.3402	0.014175
05M	0.03081	1.5405	0.385125	0.02558	0.5116	0.1279	0.5244	26.22	2.622	0.07186	2.1558	0.089825
06F	0.18816	9.408	2.352	1.48787	29.7574	7.43935	0.09819	4.9095	0.49095	0.52795	15.8385	0.659938
07F	0.35058	17.529	4.38225	0.97003	19.4006	4.85015	0.11263	5.6315	0.56315	1.14609	34.3827	1.43261
08F	0.00792	0.396	0.099	0.08506	1.7012	0.4253	0.0265	1.325	0.1325	0.2062	6.186	0.25775
09F	0.07101	3.5505	0.887625	0.08457	1.6914	0.42285	0.05534	2.767	0.2767	0.11561	3.4683	0.144513
10F	0.0721	3.605	0.90125	0.29159	5.8318	1.45795	0.05243	2.6215	0.26215	0.79053	23.7159	0.988162
Ave.			1.01905			1.5569			0.548795			0.372719
STDEV			1.35407			2.52556			0.745514			0.492016
Bioanalyzer ; 50bp~100bp
Sample ID	Qiagen (urine 4ml)			Magmax (urine 4ml)			Norgen (urine 10ml)			Zymo (urine 24ml)
	conc. (ng/ul)	Total (ng)	Yield (ng/urine1ml)	conc. (ng/ul)	Total (ng)	Yield (ng/urine1ml)	conc. (ng/ul)	Total (ng)	Yield (ng/urine1ml)	conc. (ng/ul)	Total (ng)	Yield (ng/urine1ml)
01M	0.0089	0.445	0.11125	0.023	0.46	0.115	0.02882	1.441	0.1441	0.00608	0.1824	0.0076
02M	0.00241	0.1205	0.030125	0.00993	0.1986	0.04965	0.03825	1.9125	0.19125	0.0013	0.039	0.001625
03M	0.00635	0.3175	0.079375	0.00176	0.0352	0.0088	0.02448	1.224	0.1224	0.00816	0.2448	0.0102
04M	0.00785	0.3925	0.098125	0.0112	0.224	0.056	0.01344	0.672	0.0672	0.00177	0.0531	0.0022125
05M	0.00585	0.2925	0.073125	0.0086	0.172	0.043	0.02047	1.0235	0.10235	0.01	0.3	0.0125
06F	0.02274	1.137	0.28425	0.24781	4.9562	1.23905	0.04411	2.2055	0.22055	0.0297	0.891	0.037125
07F	0.02498	1.249	0.31225	0.17567	3.5134	0.87835	0.0523	2.615	0.2615	0.12937	3.8811	0.161713
08F	0.00264	0.132	0.033	0.01668	0.3336	0.0834	0.01396	0.698	0.0698	0.01616	0.4848	0.0202
09F	0.00999	0.4995	0.124875	0.01561	0.3122	0.07805	0.02839	1.4195	0.14195	0.01084	0.3252	0.01355
10F	0.00374	0.187	0.04675	0.06147	1.2294	0.30735	0.03452	1.726	0.1726	0.09679	2.9037	0.120988
Ave.			0.119313			0.285865			0.14937			0.0387713
STDEV			0.0996505			0.423978			0.0632786			0.0558294

## Sheet: Table S2
Bioanalyzer ; 50bp~300bp
Sample ID	Qiagen (urine 4ml)			Magmax (urine 4ml)			Norgen (urine 10ml)			Zymo (urine 24ml)
	conc. (ng/ul)	Total (ng)	Yield (ng/urine1ml)	conc. (ng/ul)	Total (ng)	Yield (ng/urine1ml)	conc. (ng/ul)	Total (ng)	Yield (ng/urine1ml)	conc. (ng/ul)	Total (ng)	Yield (ng/urine1ml)			Purity, Ratio ; 50bp~300bp / 1000bp~7000bp
01M	0.03474	1.737	0.43425	0.0896	1.792	0.448	0.06914	3.457	0.3457	0.03273	0.9819	0.0409125
02M	0.01427	0.7135	0.178375	0.03528	0.7056	0.1764	0.09837	4.9185	0.49185	0.01887	0.5661	0.0235875				QC	MM	NU	ZQ
03M	0.02812	1.406	0.3515	0.00234	0.0468	0.0117	0.0449	2.245	0.2245	0.06057	1.8171	0.0757125			01M	4.57708	11.7277	17.1139	1.66058
04M	0.01753	0.8765	0.219125	0.04188	0.8376	0.2094	0.01569	0.7845	0.07845	0.01134	0.3402	0.014175			02M	1.08931	4.48855	18.1494	1.12388
05M	0.03081	1.5405	0.385125	0.02558	0.5116	0.1279	0.5244	26.22	2.622	0.07186	2.1558	0.089825			03M	2.13678	4.41509	34.8062	3.54004
06F	0.18816	9.408	2.352	1.48787	29.7574	7.43935	0.09819	4.9095	0.49095	0.52795	15.8385	0.659938			04M	8.55122	5.38996	3.1255	1.08829
07F	0.35058	17.529	4.38225	0.97003	19.4006	4.85015	0.11263	5.6315	0.56315	1.14609	34.3827	1.43261			05M	3.82733	4.60072	38.7583	3.013
08F	0.00792	0.396	0.099	0.08506	1.7012	0.4253	0.0265	1.325	0.1325	0.2062	6.186	0.25775			06F	9.46003	13.0825	13.0746	3.73241
09F	0.07101	3.5505	0.887625	0.08457	1.6914	0.42285	0.05534	2.767	0.2767	0.11561	3.4683	0.144513			07F	12.7669	23.2956	42.1835	8.71021
10F	0.0721	3.605	0.90125	0.29159	5.8318	1.45795	0.05243	2.6215	0.26215	0.79053	23.7159	0.988162			08F	1.51724	3.17744	1.98502	0.505888
Ave.			1.01905			1.5569			0.548795			0.372719			09F	3.69844	5.04896	5.45759	2.22927
STDEV			1.35407			2.52556			0.745514			0.492016			10F	4.6307	12.3607	6.125	6.82256
															ave.	5.22551	8.75873	18.0779	3.24261
															STDEV	3.81991	6.34611	15.2726	2.65081
Bioanalyzer ; 1000bp~7000bp
Sample ID	Qiagen (urine 4ml)			Magmax (urine 4ml)			Norgen (urine 10ml)			Zymo (urine 24ml)
	conc. (ng/ul)	Total (ng)	Yield (ng/urine1ml)	conc. (ng/ul)	Total (ng)	Yield (ng/urine1ml)	conc. (ng/ul)	Total (ng)	Yield (ng/urine1ml)	conc. (ng/ul)	Total (ng)	Yield (ng/urine1ml)
01M	0.00759	0.3795	0.094875	0.00764	0.1528	0.0382	0.00404	0.202	0.0202	0.01971	0.5913	0.0246375
02M	0.0131	0.655	0.16375	0.00786	0.1572	0.0393	0.00542	0.271	0.0271	0.01679	0.5037	0.0209875
03M	0.01316	0.658	0.1645	0.00053	0.0106	0.00265	0.00129	0.0645	0.00645	0.01711	0.5133	0.0213875
04M	0.00205	0.1025	0.025625	0.00777	0.1554	0.03885	0.00502	0.251	0.0251	0.01042	0.3126	0.013025
05M	0.00805	0.4025	0.100625	0.00556	0.1112	0.0278	0.01353	0.6765	0.06765	0.02385	0.7155	0.0298125
06F	0.01989	0.9945	0.248625	0.11373	2.2746	0.56865	0.00751	0.3755	0.03755	0.14145	4.2435	0.176813
07F	0.02746	1.373	0.34325	0.04164	0.8328	0.2082	0.00267	0.1335	0.01335	0.13158	3.9474	0.164475
08F	0.00522	0.261	0.06525	0.02677	0.5354	0.13385	0.01335	0.6675	0.06675	0.4076	12.228	0.5095
09F	0.0192	0.96	0.24	0.01675	0.335	0.08375	0.01014	0.507	0.0507	0.05186	1.5558	0.064825
10F	0.01557	0.7785	0.194625	0.02359	0.4718	0.11795	0.00856	0.428	0.0428	0.11587	3.4761	0.144838
Ave.			0.164112			0.12592			0.035765			0.11703
STDEV			0.0964364			0.167427			0.021201			0.152275

## Sheet: Table S3
cfDNA yield after 3 months Magmax (4mL urine)
Bioanalyzer ; 50bp~300bp
Sample ID	-20℃/-EDTA			-20℃/+EDTA			-70℃/-EDTA			-70℃/+EDTA
	conc. (ng/ul)	Total (ng)	Yield (ng/urine1ml)	conc. (ng/ul)	Total (ng)	Yield (ng/urine1ml)	conc. (ng/ul)	Total (ng)	Yield (ng/urine1ml)	conc. (ng/ul)	Total (ng)	Yield (ng/urine1ml)
01M	0.07647	1.5294	0.38235	0.00081	0.0162	0.00405	0.00505	0.101	0.02525	0	0	0
02M	0.12274	2.4548	0.6137	0.02033	0.4066	0.10165	0.00315	0.063	0.01575	0.00448	0.0896	0.0224
03M	0.02117	0.4234	0.10585	0.00342	0.0684	0.0171	0	0	0	0.02423	0.4846	0.12115				-20℃/-EDTA	-20℃/+EDTA	-70℃/-EDTA	-70℃/+EDTA
04M	1e-05	0.0002	5e-05	0.00066	0.0132	0.0033	0.04182	0.8364	0.2091	0.03595	0.719	0.17975		Ave.	50bp~300bp	0.125765	0.159725	0.225125	0.412415
05M	0.00399	0.0798	0.01995	0.02175	0.435	0.10875	0.02147	0.4294	0.10735	0.01471	0.2942	0.07355		STDEV	50bp~300bp	0.206233	0.245347	0.32565	0.546739
06F	0.00911	0.1822	0.04555	0.02436	0.4872	0.1218	0.16508	3.3016	0.8254	0.24821	4.9642	1.24105
07F	0.00015	0.003	0.00075	0.00399	0.0798	0.01995	0.00032	0.0064	0.0016	0.02655	0.531	0.13275
08F	0.01231	0.2462	0.06155	0.09841	1.9682	0.49205	0.16232	3.2464	0.8116	0.07028	1.4056	0.3514
09F	0.00517	0.1034	0.02585	0.00192	0.0384	0.0096	0.05104	1.0208	0.2552	0.08595	1.719	0.42975
10F	0.00041	0.0082	0.00205	0.1438	2.876	0.719	0	0	0	0.31447	6.2894	1.57235
Ave.			0.125765			0.159725			0.225125			0.412415
STDEV			0.206233			0.245347			0.32565			0.546739
																					-20℃	-70℃
																					0.22579	0.436195
																					#DIV/0!	#DIV/0!
